# Supplementary material for: Crystal structure of caspase-11 CARD provides insights into caspase-11 activation
Source: PubMed Central journal article supplement (PMC7552397; doi:10.1038/s41421-020-00201-w), 2020-10-13
Supplement: 41421_2020_201_MOESM1_ESM.pdf [file 41421_2020_201_MOESM1_ESM.pdf]

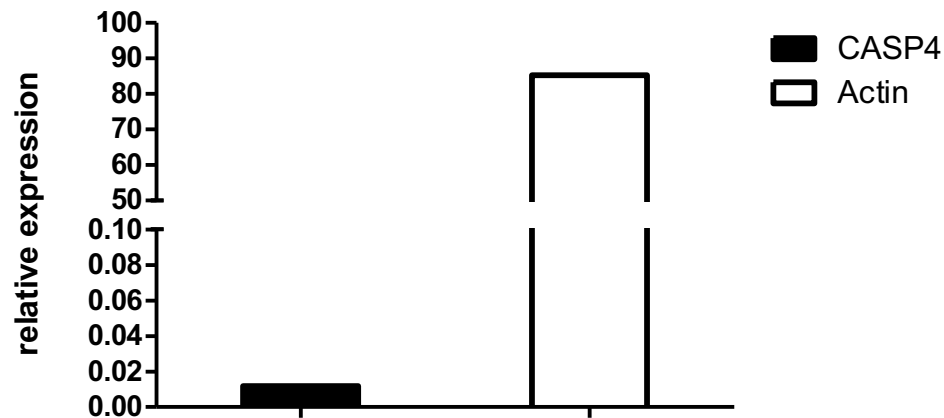

**Supplementary Fig. S1. RT-PCR detect the mRNA level of caspase-4 in HEK293T cells.**

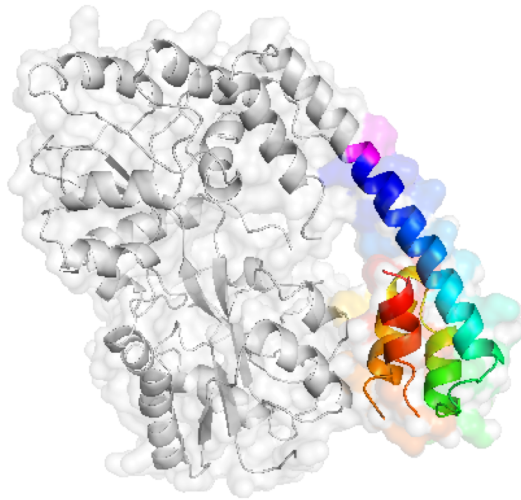

**Supplementary Fig. S2. Cartoon diagram of caspase11-CARD with the MBP fusion protein in structure. Related to Figure 1.** Cartoon diagram of caspase-11 CARD was shown with N-terminal blue to C-terminal red for chain C and MBP fusion protein in gray. The linker between CARD and MBP fusion protein was shown in rose red

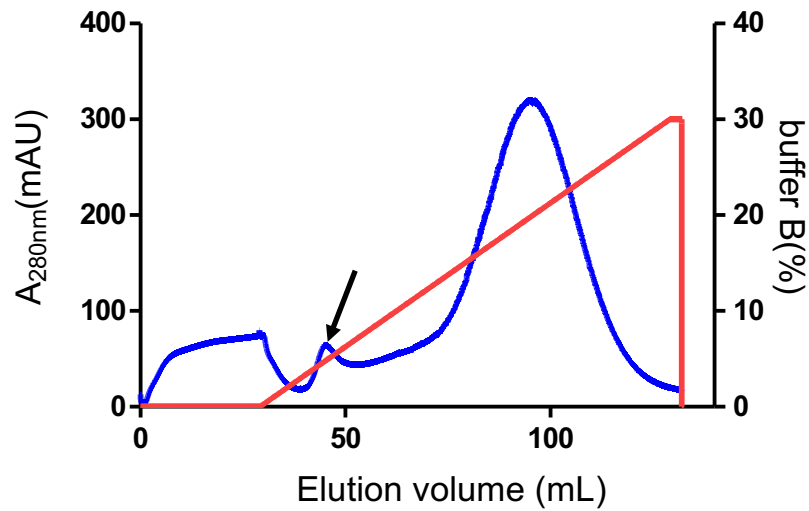

**Supplementary Fig. S3. 2<sup>nd</sup> Nickel purification analysis of VLLV-CARD in liquid without MBP fusion protein**

TEV enzyme was used to remove MBP fusion protein on N-terminal side of VLLV-CARD<sup>aa11-101</sup> protein. The arrow showed the VLLV-CARD<sup>aa11-101</sup> protein while 2<sup>nd</sup> Nickel purification.
